# Supplementary material
Source: HighWire-hosted journal article supplement (https://qualitysafety.bmj.com/content/28/1/15)
Supplement: inline-supplementary-material-1 [file inline-supplementary-material-1.docx]

Supplementary file 1: Observation data collection tool.

|  | **Describe patient participation** | **Describe clinician actions and behaviours for patient participation** | **Describe environment and safety factors** |
| --- | --- | --- | --- |
| **Entry** | Evidence of pre-round preparation  Opportunity to agree/disagree to participate  Trigger for patient entry into conversation | Instructions provided to patient eg behaviours/what to do (in round)  Timing of invitation to patient to engage  Questions used to invite participation | Physical space provided for patient/ companion  Noise |
| **Process** | | | |
| Information transfer | Information offered to conversation  Speaking up: expressed own opinions about health care  Asking questions, for information or explanation of something specific  Companion contribution  Raising problems  Patient input to decisions | Strategies used to check patient understanding, building on information  Decisions made: nature and content  Acronyms used  Specific education or information provided (eg discharge, wound care, medications )  Communication methods used (verbal, written, diagrams etc) | Conflicting/ contradictory Inconsistent information  Any communication aids used |
| Interactions | Body language-  Eye contact with staff  Reactions to interactions  Patient – clinician interactive dialogue  Interactions with specific clinician(s)  Emotional responses | Eye contact made with patient  Open or closed stance  Reciprocated interactions, response to patient  Defer to patient  Encouraging gestures/ behaviours Speaking up for patient, offer support to the patient  Emotional responses | Delays  Interruptions/ distractions  Influence of space, noise, lighting  Speaking to/ over the patient) |
| Patient progress | Patient reports any clinical outcomes/ progress  Reports barriers | Clinicians share patient progress/ outcomes  Identify barriers | Any errors detected and/or corrected  Any problems addressed/ prevented  Unintended events / consequences  Expressions of satisfaction and/or dis-satisfaction |
| Activities | Activities done for self | Activities performed |
| **Closure-exit** | Expression of agree or disagree  Clinical or non-clinical decisions | Content and subject of decisions that were made eg care plans , medications, discharge plans, follow up |
